1 **A meiotic midbody structure in mouse oocytes acts as a barrier for nascent translation to ensure**  
2 **developmental competence**

3

4 Gyu Ik Jung<sup>1,2</sup>, Daniela Londoño-Vásquez<sup>3</sup>, Sungjin Park<sup>4</sup>, Ahna R. Skop<sup>4</sup>, Ahmed Z. Balboula<sup>3</sup>, Karen  
5 Schindler<sup>1,2,\*</sup>

6

7 <sup>1</sup>Department of Genetics, Rutgers, The State University of New Jersey, Piscataway, NJ

8 <sup>2</sup>Human Genetics Institute of New Jersey, Piscataway, NJ

9 <sup>3</sup>Animal Sciences Research Center, University of Missouri, Columbia, MO

10 <sup>4</sup>Laboratory of Genetics, University of Wisconsin-Madison, Madison, WI

11

12 \* Corresponding Author

13 145 Bevier Rd

14 Piscataway, NJ 08854

15 Ph: 1-848-445-2563

16 Email: ks804@hginj.rutgers.edu

17

18 **Abstract**

19 Successful embryo development is dependent upon maternally deposited components. During egg  
20 formation, developmental competence is acquired through regulated translation of maternal mRNA  
21 stores. In addition, egg precursors undergo two rounds of chromosome segregation, each coupled to an  
22 asymmetric cytokinesis that produces two non-functional polar bodies. In somatic cells, cytokinesis  
23 produces two daughter cells and one midbody remnant (MBR), a signaling organelle assembled from the  
24 midbody (MB), which first appears in Telophase. MBs contain transcription and translation factors, and  
25 epigenetic modifiers. Once MBs mature to MBRs by abscission, they can be subsequently phagocytosed  
26 by another cell and influence cellular function or fate. Although the significance of MBs is elucidated in  
27 several cell types like neurons, cancer cells and stem cells, the presence and function of MBs in gametes  
28 and their roles in reproductive fitness are unknown. Here, we examined the formation and regulation of  
29 meiotic midbodies (mMB) in mouse oocytes. We find that although mouse oocyte mMBs contain  
30 analogous structures to somatic MBs, they also have a unique cap-like structure composed of the  
31 centralspindlin complex, and that cap formation depends upon an asymmetric microtubule abundance  
32 in the egg compared to the polar body. Furthermore, our results show that mMBs are translationally  
33 active ribonucleoprotein granules, supported by detection of ribosomes, polyadenylated mRNAs and  
34 nascent translation. Finally, by pharmacological and laser ablation-based approaches, we demonstrate  
35 that the mMB cap is a barrier to prevent translated products from leaving the egg and escaping into the  
36 polar body. Crucially, this barrier is critical for successful early embryonic development. Here, we  
37 document an evolutionary adaptation to the highly conserved process of cytokinesis in mouse oocytes  
38 and describe a new structure and new mechanism by which egg quality and embryonic developmental  
39 competence are regulated.

## 40 Introduction

41 Oocytes, gametes derived from ovaries, undergo a maturation process that couples the  
42 completion of meiosis I with acquisition of developmental competence essential to support  
43 preimplantation embryogenesis. During meiotic maturation, the egg acquires developmental  
44 competence by rearranging organelles, degrading and translating maternal mRNAs, and erasing  
45 epigenetic modifications<sup>1</sup>. Importantly, after fertilization, early embryo development depends on  
46 proteins synthesized in the egg.

47 During meiosis I completion, oocytes segregate homologous chromosomes and undergo an  
48 asymmetric cytokinesis, releasing non-functional cells called polar bodies (PB) (Fig. 1a). In somatic cells,  
49 cytokinesis not only involves separation into daughter cells, but it also leads to the formation of a  
50 transient organelle: the midbody (MB)<sup>2</sup>. After cytokinesis, MBs are released extracellularly by abscission  
51 (Fig. 1a), enabling neighboring cells to phagocytose them<sup>3-5</sup>. These MB remnants (MBRs), when  
52 phagocytosed by cancer and stem cells, are correlated with regulation of tumorigenicity and stemness,  
53 respectively, suggesting that MBR uptake has cell type-specific effects<sup>6</sup>. Mammalian oocytes, which  
54 undergo asymmetric divisions, could have either an asymmetric abscission and inheritance of the MBR,  
55 or a symmetric abscission as observed in somatic cells (Fig. 1a). However, the formation of MBs and  
56 MBRs in oocytes are unknown.

57 The capacity of MBRs to influence cellular behavior is attributed to the proteins recruited and  
58 potentially synthesized within MBs, although little is known about how this occurs in both somatic and  
59 germ cells. Because oocytes have a limited time to produce proteins critical for successful meiosis and  
60 early embryogenesis, we hypothesized that inheritance of a translationally active meiotic MB would be  
61 critical to produce an egg developmentally competent to support early embryogenesis. Here, we report  
62 the presence of a meiotic MB (mMB) in mouse oocytes and describe a unique mMB cap-like sub-

63 structure that arises from microtubule-led distortions, and we show that the mMB is abscised in a  
64 symmetric fashion to release a mMB remnant. We also report that the mMB is a translationally active  
65 ribonucleoprotein (RNP) granule and provide evidence that the mMB cap is a barrier for the translated  
66 products. Importantly, we demonstrate that this barrier contributes to full developmental competence  
67 of eggs by preventing maternal proteins from escaping into the first PB. Taken together, our findings  
68 highlight a mechanism by which a meiotic cell modifies mitotic machinery to provide developmental  
69 benefits for egg and embryo quality.

70

## 71 **Results and Discussion**

72 Because oocytes undergo asymmetric cytokinesis (Fig. 1a), we first determined if the  
73 asymmetric division of mouse oocytes dictates morphological differences in mMBs compared to  
74 morphology of mitotic MBs. Confocal imaging of anti-tubulin-stained Telophase I-staged oocytes  
75 revealed that the microtubules at the midzone spindle are asymmetric: the spindle on the maturing  
76 oocyte (or egg) side always terminated in a ball-like structure (left) and the spindle on the PB side always  
77 terminated in a socket-like structure (right) (Fig. 1b). For ease of orientation, the egg side of all  
78 presented images will be on the left and the PB side will be on the right and labeled with an asterisk. To  
79 further investigate if the overall structure of the mMB changes because of the spindle asymmetry, we  
80 identified the three landmark regions described in mitotic MBs (ring, arms, core)<sup>2</sup> by  
81 immunofluorescence to detect mitotic kinesin-like proteins 1 and 2 (MKLP1 and MKLP2) and protein  
82 regulator of cytokinesis 1 (PRC1). We examined the localization of MKLP1, MKLP2 and PRC1 proteins at  
83 meiotic stages from Metaphase I to Metaphase II, and observed dynamic localizations similar to mitotic  
84 cytokinesis<sup>2</sup> (Fig. S1), which includes localization to microtubule tips at kinetochores at Metaphases I and  
85 II, and spindle midzone localization in Anaphase I. We next evaluated and compared the localization of

86 the markers in Telophase I, the meiotic stage in which the mMB forms in mouse oocytes. PRC1 (MB  
87 core) was enriched in two disc-like structures at the spindle dark zone where the microtubule signal is  
88 absent<sup>2</sup> (Fig. 1c-d), whereas MKLP2 (MB arms) colocalized with microtubules at the midzone spindle (Fig.  
89 1e-f). These localizations are similar to observations of mitotic MBs<sup>2</sup>. Interestingly, centralspindlin  
90 component<sup>7</sup> MKLP1 (MB ring) localization was distinct from somatic cells' MB rings: in addition to a ring-  
91 like structure around the dark zone, which is similar to mitotic MBs, we also found a bulging, cap-like  
92 structure (cap) that surrounded the microtubules on the egg side and always protruded towards the PB  
93 (Fig. 1g-h). These localization patterns were not Telophase I-specific because we also observed the same  
94 localization patterns in Telophase II, the second asymmetric cytokinesis event in eggs (Fig. S2). We note  
95 that the cap starts to form in early Telophase I, but is distinct and fully formed in late Telophase I (data  
96 not shown). To our knowledge, this cap structure is not identified in other cell types.

97 To determine if the cap-and-ring structure is also observed with other MB ring markers or if this  
98 structure is unique to MKLP1, we probed Telophase I-stage oocytes for two additional markers  
99 commonly used for mitotic MB ring identification: Rac GTPase-activating protein 1 (RACGAP1), also a  
100 centralspindlin component<sup>7</sup>, and Citron Kinase (CIT; more commonly called CITK), the midbody kinase<sup>8</sup>.  
101 The images revealed that RACGAP1 localized like MKLP1 (ring + cap), whereas CITK localized only at the  
102 ring, and we did not detect a cap (Fig. 1i). We then evaluated RACGAP1 and CITK colocalization with  
103 MKLP1 by using super-resolution STED microscopy and comparing the Manders coefficients, a measure  
104 of overlap between pixels (Fig. 1j-l). The analyses indicated that there was greater colocalization of pixel  
105 signals between MKLP1 and RACGAP1 than between MKLP1 and CITK, which was expected based on  
106 their different localizations observed. These data demonstrate that mMBs have conserved structures for  
107 the arms and core as mitotic MBs, but oocytes have a modified ring that contains an additional sub-  
108 structure that bulges into the PB and consists of the centralspindlin complex that we refer here to as the  
109 cap (Fig. 1m).

110 We next sought to understand what drives the formation of the cap sub-structure. One of the  
111 major observable differences during cytokinesis between oocytes and most other mammalian somatic  
112 cells is that oocytes undergo an asymmetric division<sup>9,10</sup> (Fig. 1a). Because of this difference, we  
113 hypothesized that the asymmetric division plays a role in mMB cap formation. To address our  
114 hypothesis, we first compressed oocytes during cytokinesis, a method which induces symmetric division  
115 and results in two daughter cells of equal size<sup>11</sup>. When oocytes were forced to undergo symmetric  
116 division, we observed loss of both asymmetries (the ball/socket shape of the midzone spindle and the  
117 mMB cap) (Fig. 2a), indicating that the asymmetric cytokinetic process is involved in mMB cap  
118 formation.

119 Two major cellular components of cytokinesis and cell division are the midzone spindle and the  
120 actomyosin ring<sup>12</sup>. Because the mMB cap and ball/socket-like structure of the midzone spindle were  
121 absent when oocytes underwent symmetric division, we hypothesized that microtubules drive cap  
122 formation. To test this hypothesis, we perturbed microtubules during mMB formation using nocodazole  
123 treatment and found that increasing concentrations of this microtubule depolymerizer caused  
124 deformation of the cap at lower concentrations and complete cap regression at 50  $\mu$ M, the highest  
125 concentration tested (Fig. 2b-d). Notably, at these doses, microtubules were still present, but the  
126 microtubules were symmetric because the ball-and-socket morphology disappeared. We confirmed the  
127 participation of microtubules in cap formation by live-cell imaging mMB formation in oocytes injected  
128 with *Eb3-gfp* (end-binding protein 3), a marker of a plus-end microtubules often used as an indicator of  
129 microtubule dynamics<sup>13</sup> (Fig. 2e and Video S1). By comparing microtubule polymerization speed and  
130 density between the egg and the PB sides, we found that microtubules were more abundantly  
131 polymerized on the egg side (Fig. 2e-g). These observations are in concordance with the directionality of  
132 the cap and the ball-and-socket morphology of the midzone spindle. We also tested the ability of actin  
133 to form the mMB cap. After treatment with latrunculin A, a pharmacological agent that depolymerizes

134 actin, the cap disappeared while the ring remained (Fig. S3). But, because disruption of actin also  
135 perturbed the spindle microtubules, we cannot conclude that actin has a direct role in mMB cap  
136 formation. From these results, we concluded that microtubules distort the mMB ring and form the  
137 observed novel cap structure that is composed of centralspindlin complex proteins.

138 Studies on MB functions have extended beyond regulatory functions of cytokinesis, and now  
139 indicate their signaling capabilities<sup>6</sup> and ribonucleoprotein (RNP) properties<sup>14-16</sup>. An array of proteins  
140 involved in translation, translational regulation, and RNA molecules are enriched in mitotic MBs. The  
141 enrichment of these components suggests translational capabilities within MBs and potentially explains  
142 how its uptake through phagocytosis or inheritance could regulate cellular function in a cell type-specific  
143 manner. These properties and mMB fate are unknown in oocytes. Therefore, we first investigated  
144 whether the mMB also has RNP granule characteristics, by assessing: 1) enrichment of RNA molecules,  
145 2) increased localization of translation machinery, and 3) localized translation. By performing  
146 fluorescence *in situ* hybridization (FISH) to detect the polyadenylated (Poly-A) tail of transcripts, we  
147 found enrichment of Poly-A signal in mMBs over the background signal of RNAs in the egg cytoplasm  
148 (Fig. 3a). By immunocytochemistry, we observed that small (RPS3, RPS6, and RPS14) and large (RPL24)  
149 ribosomal subunit proteins were also enriched in mMBs (Fig. 3b). Finally, to detect nascent, active  
150 translation in the mMB, we carried out a Click chemistry-based assay that detects L-  
151 homopropargylglycine (HPG), a methionine-analog, that is integrated into proteins during acute  
152 incubation. Similar to mRNAs and ribosome subunit proteins, we found enrichment of nascent  
153 translation in oocyte mMBs (Fig. 3c). We confirmed the specificity of the HPG signal when we observed  
154 its decrease after treating oocytes with cycloheximide and puromycin, two translation inhibitors, and  
155 observed ~40% reduction in HPG signal (Figs. 3c-e). We note that the HPG signal did not completely  
156 disappear. It is possible that the timing of adding the inhibitors and having translation shut down allows  
157 for some translation to occur. Alternatively, it may be difficult for chemicals to penetrate this protein

158 dense region as also suggested by the nocodazole experiments that did not completely depolymerize  
159 microtubules.

160           Because RNP granules are biomolecular condensates consisting of RNA molecules and proteins  
161 that can behave like liquids<sup>17,18</sup>, we also tested whether mMBs are liquid-like. The aliphatic molecule 1,6-  
162 hexanediol (HD) can disrupt various phase separated, membraneless compartments<sup>19-21</sup>. Therefore, we  
163 evaluated the localization of MKLP1 after HD treatment of oocytes. Previous work demonstrated that  
164 3.5% HD treatment is sufficient to disorganize a liquid-like spindle domain in mouse oocytes<sup>22</sup>. However,  
165 we found that this concentration did not disturb the mMB (data not shown). We therefore challenged  
166 the organization of MKLP1 with 10% HD, a concentration used in other model organisms to dissolve  
167 phase-separated structures<sup>23</sup>. After HD treatment, we observed that the ring, but not the cap was  
168 disrupted, suggesting that these two subregions (cap and ring) have distinct physical organizations (Fig.  
169 3f). Consistent with phase disruption of the ring, we found that the sphericity of MKLP1, a parameter  
170 that determines how spherical a structure is, increased in the treated group because the loss of the ring  
171 structure made the overall morphology more spherical than controls (Fig. 3g). These findings support  
172 the model that the mMB is an RNP granule, consistent with our observations that there is RNA and  
173 ribosomal subunit enrichment and active translation.

174           To understand the mechanism by which mMBs could affect egg function, we tested two  
175 hypotheses: 1) that the mMB is abscised asymmetrically from the PB and inherited by the egg (Fig. 1a),  
176 and 2) that the cap regulates the fate of nascent translation occurring in the mMB. In somatic cells, the  
177 final stage of MB formation is abscission, or severing, of the microtubule arms, which leads to the  
178 extracellular release of the membrane-bound organelle (MBR)<sup>24</sup>. After release, the MBR can be  
179 internalized through phagocytosis, now called a MBsome, a necessary step for its regulatory  
180 functions<sup>6,24</sup>. Because we observed several asymmetries at the subcellular level in oocyte mMBs, we  
181 hypothesized that abscission of mMBs is asymmetric and is retained in the egg. To test this hypothesis,



182 we first evaluated the recruitment of one of the endosomal sorting complexes required for transport-III  
183 (ESCRT-III) effector proteins, charged multivesicular body protein 4B (CHMP4B), at late Telophase I<sup>25,26</sup>.  
184 One band of CHMP4B immunoreactivity would support asymmetric abscission, whereas two parallel  
185 bands flanking the dark zone would support symmetric abscission. Here, we found CHMP4B recruited to  
186 both sides of the mMB arms and flank the dark zone (Fig. S4a), supporting a symmetric abscission model  
187 that will lead to release of a mMB remnant (mMBR). To determine if the mMB is released symmetrically,  
188 we marked mMBRs with anti-MKLP1 in Metaphase II-arrested eggs, a phase after abscission occurs.  
189 Consistent with symmetric CHMP4B localization, we found the mMBR localized in distinct foci in the  
190 perivitelline space, sandwiched between the egg and the zona pellucida and was bound by the egg and  
191 PB membranes that were marked by actin staining (Fig. S4b). From these results, we conclude that the  
192 mMB in oocytes is asymmetric in morphology but its resolution into a mMBR through abscission is  
193 symmetric as in mitosis.

194 We next addressed the second hypothesis, that the mMB cap controls the fate of the mMB-  
195 localized translation. One striking feature of the HPG/translation signal in mMBs was that its localization  
196 was similar to the MKLP1/RACGAP1 cap localization (Figs. 1g,i and 3c). To further evaluate the  
197 relationship between the cap and the translation signal, we imaged Telophase I-staged oocytes to detect  
198 MKLP1 and HPG Click-IT. The data indicate that the translation signal was enclosed within the cap  
199 structure, with the HPG signal enriched specifically on the egg side of the cap and absent on the PB side  
200 (Figs. 4a, S5a and Video S2). This observation led to the hypothesis that the cap is a barrier for the  
201 proteins synthesized at mMBs to remain in the egg and thereby prevent their movement into PBs.  
202 Because we previously observed that nocodazole treatment disturbs the mMB cap (Fig. 2b-d), we  
203 compared nascent translation in mMBs with an intact cap to translation when the cap was disrupted by  
204 nocodazole treatment. In contrast to control oocytes, where translation signal stopped at the MKLP1  
205 cap signal at the egg-PB boundary, in oocytes with a disrupted cap, we saw two striking differences: 1)

206 the translation signal no longer filled the entire space within the cap and appeared disorganized, and 2)  
207 there was HPG signal leakage into the PB (Figs. 4a and Video S3). These results suggest that the mMB  
208 cap encapsulates the translation activity and products, acting as a barrier between the egg and the PB.

209 To test the model that the cap is a barrier and that it is important for downstream  
210 developmental competence of the egg, we used laser ablation to disrupt cap structure. Under  
211 brightfield illumination, the mMB was easily detectable because of its distinctive refraction (Fig. S5b). In  
212 Telophase I oocytes, we employed a multi-photon laser ablation (740 nm wavelength) to partially  
213 disrupt mMB cap integrity. Control ablation occurred adjacent, but not overlapping, to the mMB (Fig.  
214 S5b). We confirmed that ablation occurred in the mMB cap by detecting MKLP1 in control and cap-  
215 ablated oocytes. Control ablated oocytes had intact mMB rings and caps, whereas the cap-ablated  
216 oocytes only had MKLP1 rings and had a hole in the cap marked with anti-MKLP1 (Figs. 4b, S5b). We  
217 next parthenogenetically activated the non-ablated, control-ablated and cap-ablated Metaphase II-eggs  
218 and cultured parthenotes for two days. Approximately 80% of control parthenotes were activated and  
219 cleaved to the two- or four-cell embryonic stages. In contrast, cap-ablated parthenotes were less  
220 efficient because only ~30% developed to the two-cell stage and no parthenotes developed to the four-  
221 cell stage (Fig. 4c). These data support the model that that mMB cap is an oocyte-specific barrier that  
222 retains the mMB translation products within the egg which later support developmental competence  
223 and preimplantation embryo development (Fig. 4d).

224 Our data identify mMBs in mouse oocytes, and show that they have a unique structure and RNP  
225 granule properties. The mMB cap retains nascent proteins in the egg, a function critical to subsequent  
226 embryonic development (Fig. 4c). Thus, we propose a model in which the mMB cap is an evolutionary  
227 adaptation in oocyte MBs to ensure the developmental competence of eggs after fertilization by acting  
228 as both a translation hub and as a barrier that retains maternally derived proteins in the egg (Fig. 4d).

229 Somatic cell MBs can regulate cellular function post-mitotically when they are phagocytosed. In  
230 *Drosophila* gonads, germ cell cysts develop from incomplete cytokinesis. The result of the incomplete  
231 cytokinesis is formation of open intracellular bridges that allow sharing of molecules and organelles, a  
232 process essential for oocyte and spermatocyte development<sup>27-29</sup>. A similar mechanism exists in mouse  
233 and human testes, where mitotically dividing spermatogonia undergo asymmetric cytokinesis<sup>30,31</sup> and  
234 form intracellular bridges, leading to syncytia formation<sup>32</sup>. A key protein involved in forming these  
235 bridges is TEX14, and *Tex14* knockout male mice are infertile because spermatocytes cannot complete  
236 meiosis<sup>33</sup>. In the fetal mouse ovary, germ cells are also connected by intracellular bridges which later  
237 break down after birth<sup>34</sup>. Our data suggest that a mMB cap is a gate that closes what would otherwise  
238 become a leaky channel to keep essential proteins in the egg. In addition, our findings that mMBs are  
239 abscised symmetrically, releasing a mMBR, suggest a different mechanism to affect cell fate in embryos.  
240 We speculate that mMBR release from eggs can later act as signaling organelles during fertilization or  
241 pre-implantation embryogenesis if they are phagocytosed by the developing embryo. Further insight to  
242 the identity of the RNA transcripts and proteins in mMBs is needed to understand their roles in embryo  
243 development.

244 The cytoplasm of mammalian eggs sustains meiotic divisions and early embryonic development  
245 with a fixed pool of maternal transcripts that are activated and translated in a regulated fashion<sup>35-37</sup>. At  
246 the same time, the changes oocytes undergo throughout meiosis happen in a single cell cycle,  
247 emphasizing the need for oocytes to optimize and regulate the protein synthesis process.  
248 Spatiotemporal control of translation is found across forms of life as an energy efficient means to meet  
249 different needs during cell cycle and throughout different regions of a cell<sup>17,38</sup>. Oocytes lack both an  
250 interphase and an S-phase between Meiosis I and II, and they are transcriptionally silent until zygotic  
251 genome activation in embryos at the 2-cell stage in mice and 8-cell stage in humans. A recent study  
252 reports a mitochondria-dependent mode of mRNA storage in mammalian oocytes in a phase-separated,

253 membraneless region called MARDO important for regulating translation and, consequently, proper  
254 embryo development<sup>39</sup>. The common theme of oocytes using membraneless organelles to control RNA  
255 storage and localization, and spindle quality<sup>22</sup> points to a mechanism by which cells overcome the  
256 challenges of having a large cytoplasm. Our findings describe a third mechanism by which oocytes  
257 ensure their quality, developmental competence and potential in preparation for supporting  
258 embryogenesis. Future studies assessing mMBR fate and identification of mMBR proteins will be critical  
259 for understanding how embryos may benefit from mMBR inheritance.

260

## 261 **Funding**

262 This work was supported by an NIH grant R35 GM136340 to KS. DLV and AB were supported by NIH  
263 grant R35GM142537. SP and ARS were supported by grants from NSF (MCB1158003) and NIH  
264 (GM139695-01A1).

265

## 266 **Author Contributions**

267 GJ and KS, in discussion with ARS, conceived the project. GJ designed and performed experiments, data  
268 analysis, and figure preparation. DLV and AB designed and performed laser ablation experiments and  
269 analyses. GJ and KS wrote and edited the manuscript. SP, ARS, and AB provided intellectual feedback  
270 and contributed to manuscript editing.

271

## 272 **Competing Interest**

273 The authors have no conflicts to disclose.

274

## 275 **Acknowledgements**

276 The authors thank members of the Schindler lab for helpful discussions, Dr. Jessica Shivas for sharing her  
277 expertise and assistance with confocal and super resolution microscopy, and Dr. Di Wu for guidance  
278 with the fluorescence *in situ* hybridization protocol. The authors also thank Yi Jing Calvin Liu for his help  
279 with coding a script for analyzing live-cell imaging data and H. Adam Steinberg, owner of ArtforScience,  
280 for creating the schematic models.

281

## 282 **Materials and methods**

### 283 **Oocyte and egg collection and culture**

284 Sexually mature CF-1 female mice (6-10 weeks of age) were used for all experiments (Envigo,  
285 Indianapolis, IN, USA). All animals were maintained in accordance with the guidelines and policies from  
286 the Institutional Animal Use and Care Committee at Rutgers University (Protocol# 201702497) and the  
287 Animal Care Quality Assurance at the University of Missouri (Reference# 9695). Experimental  
288 procedures involving animals were approved by these regulatory bodies. Mice were housed in a room  
289 programmed for a 12-hour dark/light cycle and constant temperature, and with food and water  
290 provided *ad libitum*. Females were injected intraperitoneally with 5 I.U. of pregnant mare serum  
291 gonadotropin 48 hours prior to oocyte collection (Lee Biosolutions, Cat# 493-10). Prophase I-arrested  
292 oocytes were harvested as previously described<sup>40</sup>. Briefly, cells were collected in minimal essential  
293 medium (MEM) containing 2.5  $\mu$ M milrinone (Sigma-Aldrich, M4659) to prevent meiotic resumption,  
294 and cultured in Chatot, Ziomek, and Bavister (CZB) media<sup>41</sup> without milrinone in a humidified incubator  
295 programmed to 5% CO<sub>2</sub> and 37<sup>0</sup> C for 11-12 hours for cytokinesis at meiosis I, or overnight for certain  
296 drug treatments.

297 For evaluating midbodies in meiosis II, ovulated eggs were activated with 10 mM strontium chloride  
298 (Sigma Aldrich, Cat# 25521) to induce Anaphase II onset. To collect ovulated eggs, mice were injected  
299 with human chorionic gonadotropin (hCG) (Sigma Aldrich, Cat# CG5) 48 hours after PMSG injection to  
300 stimulate ovulation of Metaphase II-arrested eggs. 14-16 hours following hCG injection, eggs were  
301 harvested from the ampulla region of the oviducts in MEM containing 3 mg/ml of hyaluronidase (Sigma  
302 Aldrich, Cat# H3506) to aid detachment of cumulus cells. Eggs were then transferred to center-well  
303 organ culture dish (Becton Dickinson, Cat# 353037) with activation media, consisting of Ca<sup>2+</sup>/Mg<sup>2+</sup>-free  
304 CZB with 10 mM of strontium chloride, and cultured in a humidified incubator programmed to 5% CO<sub>2</sub>  
305 and 37°C. After 3 hours, activated eggs were cultured for 3 additional hours in KSOM + amino acids  
306 media (Sigma Aldrich, Cat# MR-106-D). For parthenogenetic activation of eggs, the activation and KSOM  
307 media were supplemented with 5 µg/ml cytochalasin D (Sigma Aldrich, Cat# C2743). Parthenogenetically  
308 activated eggs were incubated for 48 hours in KSOM + amino acids media to assess embryo cleavage  
309 rate.

310 For microinjection, collected oocytes were maintained arrested at prophase I with milrinone before  
311 injection to prevent nuclear disruption and after injection to allow translation of cRNAs. To induce  
312 symmetric division of oocytes, cells were compressed once they reached Metaphase I<sup>11</sup>. Briefly, after  
313 culturing for 8 hours, cells were transferred to a 5-7 µl drop of CZB covered with mineral oil (Sigma  
314 Aldrich, Cat# M5310). A glass cover slip was placed on top of the media drop and pressed down on the  
315 edges to spread the media to cover the entire surface of the cover slip. The cover slip was then pressed  
316 down until oocytes flattened and the zona pellucida became indistinguishable from the cell membrane.  
317 Cells were then cultured for additional 3 hours to observe cytokinesis.

318

319 **Inhibition and disruption of mMB**

320 To depolymerize microtubules and actin during mMB formation, oocytes were cultured in CZB for 11  
321 hours and then transferred to media containing nocodazole (Sigma Aldrich, Cat# M1404) (0, 10, 25, and  
322 50  $\mu$ M) or latrunculin A (Cayman Chemical Company, Cat# 10010630) (0, 5, and 10  $\mu$ M) in a center-well  
323 dish for 30 additional minutes.

324 For translation inhibition, oocytes were cultured for 9 hours prior to overnight in center-well organ  
325 dishes with CZB media supplemented with glutamine, containing either cycloheximide at 50  $\mu$ g/ml  
326 (Sigma-Aldrich, Cat# C7698) or puromycin at 1  $\mu$ g/ml (Sigma-Aldrich, Cat# P7255).

327

### 328 **Ablation of mMB cap by laser ablation**

329 Prophase I-arrested oocytes were cultured *in vitro* in milrinone-free CZB medium supplemented with  
330 100 nM SiR-tubulin (Cytoskeleton #NC0958386) in a humidified, microenvironmental chamber (5% CO<sub>2</sub>  
331 and 37<sup>o</sup> C) equipped to a Leica TCP SP8 inverted microscope. After culturing cells for 11 hours, mMB  
332 caps were partially ablated using a multi-photon laser as previously described<sup>42</sup>. In brief, a 4 $\mu$ m<sup>2</sup> square  
333 region of interest within the mMB cap was exposed to a 740 nm wavelength and 60-70 mW power laser  
334 beam at the sample plane. For control-ablated oocytes, the cytoplasmic region adjacent to the mMB  
335 was exposed to the same protocol. A subset of cap-ablated, control-ablated and non-ablated oocytes  
336 were fixed and immunostained with MKLP1 antibody to assess the efficiency of laser ablation and mMB  
337 cap disruption.

338

### 339 **Immunofluorescence**

340 Following meiotic maturation, oocytes or activated eggs were fixed in various conditions to detect  
341 localization of proteins. For detection of PRC1 (Proteintech, 15617-1-AP, 1:100), CIT-K (BD Biosciences,

342 611376, 1:100), RACGAP1 (Santa Cruz, sc-271110, 1:50), MKLP1 (Novus Biologicals, NBP2-56923, 1:100),  
343 and MKLP2 (Proteintech, 67190-1, 1:100), oocytes were fixed in 2% PFA in phosphate-buffered saline  
344 (PBS) for 20 minutes at room temperature. For detection of RPS3 (Cell Signaling Technology, 2579S,  
345 1:30), RPS6 (Santa Cruz, sc-74459, 1:30), RPS14 (Proteintech, 16683-1-AP, 1:30), and RPL24  
346 (ThermoFisher, PA5-62450, 1:30), oocytes were fixed in cold methanol (Sigma Aldrich, Cat# A452-4) for  
347 10 minutes. For detection of CHMP4B (Proteintech, 13683-1-AP, 1:30), zona pellucida were removed  
348 from oocytes by brief treatment with acidic Tyrode's solution (Sigma Aldrich, Cat# MR-004-D) and fixed  
349 with 2% PFA in PBS for 20 minutes at room temperature. After fixation, oocytes were incubated in  
350 blocking buffer (0.3% BSA and 0.01% Tween in PBS) for at least 10 minutes before proceeding. For  
351 permeabilization, oocytes were incubated in PBS containing 0.2% Triton-X for 20 minutes and blocked  
352 with blocking buffer for 10 minutes. For RPS3, RPS6, RPS14, RPL24, RACGAP1, and CHMP4B, cells were  
353 incubated overnight at 4<sup>o</sup>C with primary antibody. For all other proteins, primary incubation was  
354 performed for 1 hour at room temperature. For secondary antibody incubation, oocytes were incubated  
355 for 1 hour in a dark, humidified chamber at room temperature. Both antibody incubations were  
356 followed by three washes in blocking solution, 10 minutes each. After the last wash, oocytes were  
357 mounted in 10 µl of Vectashield (Vector Laboratories, Cat# H-1000) containing 4,6-Diamidino-2-  
358 Phenylindole, Dihydrochloride (DAPI) (Life Technologies, Cat# D1306; 1:170) for confocal microscopy.  
359 For super-resolution microscopy using the tau-3X STED module from Leica Biosystems, the same steps  
360 as the ones described above for confocal microscopy were followed except for the following changes: 1)  
361 antibody concentrations were doubled for primary antibodies and 2) after the third wash following  
362 secondary antibody incubation, cells were mounted in 10 µl of EMS glycerol mounting medium with  
363 DABCO (EMS, Cat# 17989-10).

364



365 **RNA *in situ* hybridization**

366 To detect RNA molecules, fluorescence *in situ* hybridization (FISH) against the poly-A tail of transcripts  
367 was performed using an oligo-dT probe that consists of 21 thymine nucleotides with a 3' modification of  
368 a fluorophore as described <sup>43</sup>. Briefly, oocytes were fixed in increasing volumes of methanol-free 4%  
369 formaldehyde diluted in RNase-free 1X PBS at 37<sup>0</sup> C for 45 minutes. Oocytes were then dehydrated in  
370 increasing concentrations of methanol and stored at -20<sup>0</sup> C until further processing. Oocytes were  
371 prepared for hybridization by washing through 1X PBS with 0.1% Tween-20 (PBT), followed by 10%  
372 formamide and 2X SSC in nuclease-free water (Wash A). For the hybridization reaction, oocytes were  
373 incubated in a 10% formamide, 2X SSC and 10% dextran sulfate solution in nuclease-free water with  
374 12.5 μM of the probe overnight at 37<sup>0</sup>C. After hybridization, samples were rinsed through several  
375 volumes of fresh, pre-warmed Wash A and PBT before mounting on 10 μl of Vectashield with DAPI for  
376 imaging.

377

378 **Nascent protein detection assay**

379 Translation activity at the midbody was assessed by detecting protein synthesis level using an *L*-HPG-  
380 translation kit (ThermoFisher, Cat# C10429) as previously described <sup>44</sup>. In summary, oocytes were  
381 collected and matured for 11.5 hours, then transferred to DMEM medium lacking methionine  
382 (ThermoFisher, Cat# 42-360-032) and containing HPG diluted 1:50 for 30-45 minutes, followed by  
383 fixation with 2% PFA in PBS for 20 minutes at room temperature and subsequent detection of HPG  
384 signal by immunofluorescence.

385

386 **Image acquisition and live-cell imaging**

387 Confocal and super-resolution images were acquired using a Leica SP8 confocal microscope with  
388 Lightning module equipped with a 40X, 1.30NA oil-immersion objective. Super-resolution STED images  
389 were acquired using a Leica SP8 confocal microscope with Tau-STED module equipped with a 93X,  
390 1.30NA glycerol-immersion objective. For each image, optical z-sections were obtained using 0.5-1  $\mu\text{m}$   
391 step-size with a zoom factor of 2.5-6. Oocytes from experiments involving comparison of intensities or  
392 stages were processed on the same day and imaged maintaining laser settings equal across samples.

393 Live-cell confocal image acquisition was performed using a Leica SP8 confocal microscope system with a  
394 40X, 1.30NA oil-immersion objective, equipped with a heated, humidified stage top incubator with 5%  
395  $\text{CO}_2$  and  $37^\circ\text{C}$  (Tokai Hit, STX stage top incubator). To observe progression through cytokinesis, images  
396 of oocytes were acquired every 20 minutes with 15 optical sections across the entire thickness of each  
397 oocyte at 1024x1024-pixel image resolution and 600 Hz acquisition speed. For EB3-GFP tracking during  
398 cytokinesis, images were taken every 0.5 second at a single plane at 1024x512-pixel image resolution  
399 and 1000 Hz acquisition speed.

400

#### 401 **Cloning and cRNA preparation**

402 To generate cRNA of *Eb3-egfp*<sup>45</sup>, the plasmid was linearized and transcribed *in vitro* using mMessage  
403 mMachine T7 kit (Ambion, Cat# AM1344) according to manufacturer's protocol.

404 cRNA was purified using SeraMag Speedbead (Sigma Aldrich, Cat# GE65152105050250) nucleotide  
405 purification method previously described<sup>46</sup>. Briefly, *in vitro* transcription reaction solution was brought  
406 up to 150  $\mu\text{l}$  and mixed with 100  $\mu\text{l}$  of magnetic beads and let stand for 5 minutes. Beads were then  
407 pelleted using a magnetic stand and washed with 80% ethanol. cRNA was eluted using 20  $\mu\text{l}$  nuclease-  
408 free water and stored at  $-80^\circ\text{C}$ .

409

## 410 **Image analysis and quantification**

411 All images and videos were analyzed and quantified using Imaris software (Bitplane, Oxford Instrument  
412 Company) and Fiji <sup>47</sup>. Quantification of sphericity, volume, and intensity were performed by creating a  
413 region of interest (ROI) with the “surfaces” tool in Imaris. To determine ROI, threshold of signal was  
414 determined from control groups and applied in treatment groups. For co-localization analyses, the “co-  
415 localization analysis” tool in Imaris was used. For EB3-GFP speed tracking, videos were processed by  
416 Gaussian filter blend and background subtraction. Individual puncta were then determined using the  
417 “spots” tool and filtering for spots that could be tracked in at least 3 continuous frames. For EB3-GFP  
418 intensity measurements, the first frame of each video was used to compare the intensity of the egg side  
419 to the PB side. The dark zone was used as a reference to distinguish the egg and the PB and mark ROIs.

420

## 421 **Statistical analysis**

422 As indicated in the figure legends, one-way ANOVA and unpaired Student’s t-test analyses were  
423 performed to examine statistical differences between groups using GraphPad Prism software.  $p < 0.05$   
424 was considered statistically significant. All error bars shown reflect standard errors of means.

425

## 426 **References**

- 427 1 Sha, Q. Q., Zhang, J. & Fan, H. Y. A story of birth and death: mRNA translation and clearance at  
428 the onset of maternal-to-zygotic transition in mammals. *Biol Reprod* **101**, 579-590 (2019).  
429 <https://doi.org/10.1093/biolre/iox012>
- 430 2 Hu, C. K., Coughlin, M. & Mitchison, T. J. Midbody assembly and its regulation during cytokinesis.  
431 *Mol Biol Cell* **23**, 1024-1034 (2012). <https://doi.org/10.1091/mbc.E11-08-0721>
- 432 3 Crowell, E. F., Gaffuri, A. L., Gayraud-Morel, B., Tajbakhsh, S. & Echard, A. Engulfment of the  
433 midbody remnant after cytokinesis in mammalian cells. *J Cell Sci* **127**, 3840-3851 (2014).  
434 <https://doi.org/10.1242/jcs.154732>

- 435 4 Kuo, T. C. *et al.* Midbody accumulation through evasion of autophagy contributes to cellular  
436 reprogramming and tumorigenicity. *Nat Cell Biol* **13**, 1214-1223 (2011).  
437 <https://doi.org/10.1038/ncb2332>
- 438 5 Peterman, E. *et al.* The post-abscission midbody is an intracellular signaling organelle that  
439 regulates cell proliferation. *Nat Commun* **10**, 3181 (2019). [https://doi.org/10.1038/s41467-019-](https://doi.org/10.1038/s41467-019-10871-0)  
440 [10871-0](https://doi.org/10.1038/s41467-019-10871-0)
- 441 6 Farmer, T. & Prekeris, R. New signaling kid on the block: the role of the postmitotic midbody in  
442 polarity, stemness, and proliferation. *Mol Biol Cell* **33** (2022). [https://doi.org/10.1091/mbc.E21-](https://doi.org/10.1091/mbc.E21-06-0288)  
443 [06-0288](https://doi.org/10.1091/mbc.E21-06-0288)
- 444 7 White, E. A. & Glotzer, M. Centralspindlin: at the heart of cytokinesis. *Cytoskeleton (Hoboken)*  
445 **69**, 882-892 (2012). <https://doi.org/10.1002/cm.21065>
- 446 8 Bassi, Z. I., Audusseau, M., Riparbelli, M. G., Callaini, G. & D'Avino, P. P. Citron kinase controls a  
447 molecular network required for midbody formation in cytokinesis. *Proc Natl Acad Sci U S A* **110**,  
448 9782-9787 (2013). <https://doi.org/10.1073/pnas.1301328110>
- 449 9 Green, R. A., Paluch, E. & Oegema, K. Cytokinesis in animal cells. *Annu Rev Cell Dev Biol* **28**, 29-  
450 58 (2012). <https://doi.org/10.1146/annurev-cellbio-101011-155718>
- 451 10 Chaigne, A., Terret, M. E. & Verlhac, M. H. Asymmetries and Symmetries in the Mouse Oocyte  
452 and Zygote. *Results Probl Cell Differ* **61**, 285-299 (2017). [https://doi.org/10.1007/978-3-319-](https://doi.org/10.1007/978-3-319-53150-2_13)  
453 [53150-2\\_13](https://doi.org/10.1007/978-3-319-53150-2_13)
- 454 11 Otsuki, J. *et al.* Symmetrical division of mouse oocytes during meiotic maturation can lead to the  
455 development of twin embryos that amalgamate to form a chimeric hermaphrodite. *Hum Reprod*  
456 **27**, 380-387 (2012). <https://doi.org/10.1093/humrep/der408>
- 457 12 Normand, G. & King, R. W. Understanding cytokinesis failure. *Adv Exp Med Biol* **676**, 27-55  
458 (2010). [https://doi.org/10.1007/978-1-4419-6199-0\\_3](https://doi.org/10.1007/978-1-4419-6199-0_3)
- 459 13 Stepanova, T. *et al.* Visualization of microtubule growth in cultured neurons via the use of EB3-  
460 GFP (end-binding protein 3-green fluorescent protein). *J Neurosci* **23**, 2655-2664 (2003).
- 461 14 Bonner, M. K. *et al.* Mitotic spindle proteomics in Chinese hamster ovary cells. *PLoS One* **6**,  
462 e20489 (2011). <https://doi.org/10.1371/journal.pone.0020489>
- 463 15 Capalbo, L. *et al.* The midbody interactome reveals unexpected roles for PP1 phosphatases in  
464 cytokinesis. *Nat Commun* **10**, 4513 (2019). <https://doi.org/10.1038/s41467-019-12507-9>
- 465 16 Skop, A. R., Liu, H., Yates, J., 3rd, Meyer, B. J. & Heald, R. Dissection of the mammalian midbody  
466 proteome reveals conserved cytokinesis mechanisms. *Science* **305**, 61-66 (2004).  
467 <https://doi.org/10.1126/science.1097931>
- 468 17 Das, S., Vera, M., Gandin, V., Singer, R. H. & Tutucci, E. Intracellular mRNA transport and  
469 localized translation. *Nat Rev Mol Cell Biol* **22**, 483-504 (2021). [https://doi.org/10.1038/s41580-](https://doi.org/10.1038/s41580-021-00356-8)  
470 [021-00356-8](https://doi.org/10.1038/s41580-021-00356-8)
- 471 18 Brangwynne, C. P. *et al.* Germline P granules are liquid droplets that localize by controlled  
472 dissolution/condensation. *Science* **324**, 1729-1732 (2009).  
473 <https://doi.org/10.1126/science.1172046>
- 474 19 Yang, C., Dominique, G. M., Champion, M. M. & Huber, P. W. Remnants of the Balbiani body are  
475 required for formation of RNA transport granules in *Xenopus* oocytes. *iScience* **25**, 103878  
476 (2022). <https://doi.org/10.1016/j.isci.2022.103878>
- 477 20 Geiger, F. *et al.* Liquid-liquid phase separation underpins the formation of replication factories in  
478 rotaviruses. *EMBO J* **40**, e107711 (2021). <https://doi.org/10.15252/embj.2021107711>
- 479 21 Agote-Aran, A. *et al.* Spatial control of nucleoporin condensation by fragile X-related proteins.  
480 *EMBO J* **39**, e104467 (2020). <https://doi.org/10.15252/embj.2020104467>
- 481 22 So, C. *et al.* A liquid-like spindle domain promotes acentrosomal spindle assembly in mammalian  
482 oocytes. *Science* **364** (2019). <https://doi.org/10.1126/science.aat9557>

- 483 23 Ding, D. Q. *et al.* Chromosome-associated RNA-protein complexes promote pairing of  
484 homologous chromosomes during meiosis in *Schizosaccharomyces pombe*. *Nat Commun* **10**,  
485 5598 (2019). <https://doi.org/10.1038/s41467-019-13609-0>
- 486 24 Peterman, E. & Prekeris, R. The postmitotic midbody: Regulating polarity, stemness, and  
487 proliferation. *J Cell Biol* **218**, 3903-3911 (2019). <https://doi.org/10.1083/jcb.201906148>
- 488 25 Petsalaki, E. & Zachos, G. The Abscission Checkpoint: A Guardian of Chromosomal Stability. *Cells*  
489 **10** (2021). <https://doi.org/10.3390/cells10123350>
- 490 26 Renshaw, M. J., Liu, J., Lavoie, B. D. & Wilde, A. Anillin-dependent organization of septin  
491 filaments promotes intercellular bridge elongation and Chmp4B targeting to the abscission site.  
492 *Open Biol* **4**, 130190 (2014). <https://doi.org/10.1098/rsob.130190>
- 493 27 Greenbaum, M. P., Iwamori, T., Buchold, G. M. & Matzuk, M. M. Germ cell intercellular bridges.  
494 *Cold Spring Harb Perspect Biol* **3**, a005850 (2011). <https://doi.org/10.1101/cshperspect.a005850>
- 495 28 Huynh, J. R. & St Johnston, D. The origin of asymmetry: early polarisation of the *Drosophila*  
496 germline cyst and oocyte. *Curr Biol* **14**, R438-449 (2004).  
497 <https://doi.org/10.1016/j.cub.2004.05.040>
- 498 29 Lu, K., Jensen, L., Lei, L. & Yamashita, Y. M. Stay Connected: A Germ Cell Strategy. *Trends Genet*  
499 **33**, 971-978 (2017). <https://doi.org/10.1016/j.tig.2017.09.001>
- 500 30 Huckins, C. The spermatogonial stem cell population in adult rats. I. Their morphology,  
501 proliferation and maturation. *Anat Rec* **169**, 533-557 (1971).  
502 <https://doi.org/10.1002/ar.1091690306>
- 503 31 de Rooij, D. G. The nature and dynamics of spermatogonial stem cells. *Development* **144**, 3022-  
504 3030 (2017). <https://doi.org/10.1242/dev.146571>
- 505 32 Fawcett, D. W., Ito, S. & Slautterback, D. The occurrence of intercellular bridges in groups of cells  
506 exhibiting synchronous differentiation. *J Biophys Biochem Cytol* **5**, 453-460 (1959).  
507 <https://doi.org/10.1083/jcb.5.3.453>
- 508 33 Greenbaum, M. P. *et al.* TEX14 is essential for intercellular bridges and fertility in male mice.  
509 *Proc Natl Acad Sci U S A* **103**, 4982-4987 (2006). <https://doi.org/10.1073/pnas.0505123103>
- 510 34 Pepling, M. E. & Spradling, A. C. Mouse ovarian germ cell cysts undergo programmed breakdown  
511 to form primordial follicles. *Dev Biol* **234**, 339-351 (2001).  
512 <https://doi.org/10.1006/dbio.2001.0269>
- 513 35 Luong, X. G., Daldello, E. M., Rajkovic, G., Yang, C. R. & Conti, M. Genome-wide analysis reveals a  
514 switch in the translational program upon oocyte meiotic resumption. *Nucleic Acids Res* **48**, 3257-  
515 3276 (2020). <https://doi.org/10.1093/nar/gkaa010>
- 516 36 Yang, C. R. *et al.* The RNA-binding protein DAZL functions as repressor and activator of mRNA  
517 translation during oocyte maturation. *Nat Commun* **11**, 1399 (2020).  
518 <https://doi.org/10.1038/s41467-020-15209-9>
- 519 37 Chen, J. *et al.* Genome-wide analysis of translation reveals a critical role for deleted in  
520 azoospermia-like (*Dazl*) at the oocyte-to-zygote transition. *Genes Dev* **25**, 755-766 (2011).  
521 <https://doi.org/10.1101/gad.2028911>
- 522 38 Chaigne, A. & Brunet, T. Incomplete abscission and cytoplasmic bridges in the evolution of  
523 eukaryotic multicellularity. *Curr Biol* **32**, R385-R397 (2022).  
524 <https://doi.org/10.1016/j.cub.2022.03.021>
- 525 39 Cheng, S. *et al.* Mammalian oocytes store mRNAs in a mitochondria-associated membraneless  
526 compartment. *Science* **378**, eabq4835 (2022). <https://doi.org/10.1126/science.abq4835>
- 527 40 Blengini, C. S. & Schindler, K. Immunofluorescence Technique to Detect Subcellular Structures  
528 Critical to Oocyte Maturation. *Methods Mol Biol* **1818**, 67-76 (2018).  
529 [https://doi.org/10.1007/978-1-4939-8603-3\\_8](https://doi.org/10.1007/978-1-4939-8603-3_8)

- 530 41 Chatot, C. L., Ziomek, C. A., Bavister, B. D., Lewis, J. L. & Torres, I. An improved culture medium  
531 supports development of random-bred 1-cell mouse embryos in vitro. *J Reprod Fertil* **86**, 679-  
532 688 (1989). <https://doi.org/10.1530/jrf.0.0860679>
- 533 42 Londono-Vasquez, D., Rodriguez-Lukey, K., Behura, S. K. & Balboula, A. Z. Microtubule organizing  
534 centers regulate spindle positioning in mouse oocytes. *Dev Cell* **57**, 197-211 e193 (2022).  
535 <https://doi.org/10.1016/j.devcel.2021.12.011>
- 536 43 Wu, D. & Dean, J. EXOSC10 sculpts the transcriptome during the growth-to-maturation  
537 transition in mouse oocytes. *Nucleic Acids Res* **48**, 5349-5365 (2020).  
538 <https://doi.org/10.1093/nar/gkaa249>
- 539 44 Aboelenain, M. & Schindler, K. Aurora kinase B inhibits aurora kinase A to control maternal  
540 mRNA translation in mouse oocytes. *Development* **148** (2021).  
541 <https://doi.org/10.1242/dev.199560>
- 542 45 Schuh, M. & Ellenberg, J. Self-organization of MTOCs replaces centrosome function during  
543 acentrosomal spindle assembly in live mouse oocytes. *Cell* **130**, 484-498 (2007).  
544 <https://doi.org/10.1016/j.cell.2007.06.025>
- 545 46 Modzelewski, A. J. *et al.* Efficient mouse genome engineering by CRISPR-EZ technology. *Nat*  
546 *Protoc* **13**, 1253-1274 (2018). <https://doi.org/10.1038/nprot.2018.012>
- 547 47 Schindelin, J. *et al.* Fiji: an open-source platform for biological-image analysis. *Nat Methods* **9**,  
548 676-682 (2012). <https://doi.org/10.1038/nmeth.2019>

549

## 550 **Figure Legends**

551 **Figure 1. The meiotic midbody of mouse oocytes is asymmetric.** a) Schematic depicting the distinct  
552 processes of mitotic cytokinesis and meiosis I cytokinesis in mammalian oocytes with the unknown  
553 outcome of midbody abscission in oocytes. b) Representative image of a mouse oocyte undergoing  
554 cytokinesis with views at XY, XZ and YZ planes. Yellow arrowhead highlights the asymmetry observed in  
555 the midzone spindle; the asterisk denotes the polar body (PB). Under confocal images is a three-  
556 dimensional coordinate system with axes depicting orientation of the different views. c, e, g)  
557 Representative z-plane projected confocal images showing localization of representative markers for the  
558 three main regions of the midbody (gray; PRC1, MKLP2 and MKLP1) relative to microtubules (green) and  
559 chromosomes (blue). Yellow arrows indicate direction of line scan plots in (d, f, h). The asterisk denotes  
560 the polar body; the numbers in the MKLP1 panel indicate the three peaks in the line scan in (h). d, f, h)  
561 Intensity line scan plots for microtubules (green) and corresponding protein (gray) of images in (c, e, g).  
562 Gray dotted lines demark the beginning and end of the midbody dark zones. i) Representative confocal  
563 images for localization of CITK (gray; top panels) and RACGAP1 (gray; bottom panels) relative to  
564 microtubules (green). The asterisk denotes the polar body. j) Representative confocal images comparing  
565 the localization of MKLP1 (magenta) with additional ring markers (gray; RACGAP1 (top panels) and CITK  
566 (bottom panels)). Signal that colocalized between the two ring components compared is shown in gray.  
567 k-l) Quantification of Manders coefficient to compare signal colocalization between (k) MKLP1 and  
568 RACGAP1, and (l) MKLP1 and CITK. Unpaired Student's t-test, two-tailed; 10 oocytes for (k), 7 oocytes for  
569 (l). m) Schematic summarizing morphology of meiotic midbody. Scale bars = 10µm and 5µm in zoom  
570 panels; \*\*\*p < 0.001, \*\*\*\*p<0.0001.

571 **Figure 2. Microtubules drive distortion of meiotic MB ring and formation of meiotic midbody cap.** a) 572 Comparison of the ring structure (MKLP1, gray) and microtubules (green) when oocytes undergo 573 asymmetric (top panels) or symmetric (bottom panels) divisions. b) Representative confocal images for 574 nocodazole dose-dependent reduction in distortion and asymmetry of ring (gray) and midzone spindle 575 (green). The asterisk denotes the polar body (PB) and the regions of the ring numbered are the peaks 576 detected in the line scans in d). c) Quantification of surface area occupied by ring after nocodazole 577 treatment. Unpaired Student's t-test, two-tailed; 3 replicates; number of oocytes in DMSO: 48, 10  $\mu$ M: 578 21, 25  $\mu$ M: 42, 50  $\mu$ M: 30; \*\* $p < 0.01$ . d) Plots of line scans of the intensity of MKLP1 from control and 579 nocodazole-treated oocytes in b). The numbers reflect the numbers labeled in the corresponding 580 images. e-g) Comparison of microtubule polymerization and dynamics during meiosis I cytokinesis by 581 live-cell imaging of oocytes expressing EB3-GFP. e) Representative still image from live-cell confocal 582 imaging of oocytes undergoing cytokinesis and expressing EB3-GFP. White line delineates the egg (left) 583 and PB (right) sides. f) Average speed of EB3-GFP puncta in egg versus PB; 10 oocytes. g) Average 584 intensity of EB3-GFP in egg versus PB. Unpaired Student's t-test, two-tailed; 10 oocytes; \*\*  $p < 0.01$ , 585 \*\*\*\*  $p < 0.0001$ . Scale bars = 10  $\mu$ m.

586 **Figure 3. The meiotic midbody is a translationally active RNP granule.** a) Confocal images showing 587 localization of polyadenylated (Poly-A) tails of RNA molecules at the midbody region, detected by RNA 588 FISH. The PB is encircled and denoted with an asterisk; the yellow arrowhead highlights the FISH signal 589 enriched in the midbody region. b) Confocal images representing localization of small (RPS3, RPS6, and 590 RPS14) and large (RPL24) ribosomal subunits (gray) at the midbody ring region relative to midzone 591 spindle (green). The asterisk denotes the polar body (PB) and the yellow arrowhead points to the 592 ribosomal subunit proteins. c) Representative confocal images for translational activity (gray) by Click-IT 593 assay with and without inhibition of translation with cycloheximide (CHX) or puromycin (Puro); midzone 594 spindle (green). HPG = homopropargylglycine; the asterisk denotes the PB. d) Quantification of 595 translation signal at the midbody region in control versus CHX-treated cells. Unpaired Student's t-test, 596 two-tailed; 3 replicates; number of oocytes in DMSO: 48, CHX: 62. e) Quantification of translation signal 597 at the midbody region in control versus puromycin-treated cells. Unpaired Student's t-test, two-tailed; 2 598 replicates; number of oocytes in DMSO: 44, Puro: 49. f) Representative confocal images of midbody ring 599 (MKLP1, gray) morphology after 1,6-hexanediol (HD) treatment. Microtubules (green) and chromosomes 600 (blue) are also depicted. On the right, is a cartoon of the observed changes in ring and cap shapes after 601 HD treatment. The asterisk denotes the PB. g) Quantification of sphericity as an indicator of ring 602 morphology changes after HD treatment. Unpaired Student's t-test, two-tailed; 3 replicates; number of 603 oocytes in control: 21, HD: 20; \*\*\*\* $p < 0.0001$ . Scale bars = 10  $\mu$ m and 5  $\mu$ m in zoom panels.

604 **Figure 4. The meiotic MB cap acts as a barrier pre-abscission.** a) Representative confocal images 605 showing localization of meiotic midbody ring MKLP1 in relation to translation signal from Click-IT 606 labeling with views at XY, XZ and YZ planes. The panels on the left are control, DMSO treated oocytes 607 and the panels on the right are nocodazole-treated oocytes where the cap is disrupted. The asterisk 608 denotes the polar body (PB). Under confocal images are three-dimensional coordinate systems with 609 axes depicting orientation of the different views. b) Representative z-series confocal images of mMB 610 caps of oocytes from non-ablated, control-ablated, and mMB cap-ablated oocytes. Two mMB cap- 611 ablated oocytes are shown, one with a side view (oocyte #1) and one with a head-on view (oocyte #2). 612 Arrowhead indicates where laser ablation took place. c) Images of parthenotes after ablation, activation 613 and development *in vitro*. The graph above images quantifies the percentage of parthenotes at each

614 developmental stage. \*\*\* $p < 0.001$  compared to non-ablated group; ##  $p < 0.01$ , ###  $p < 0.001$   
615 compared to control-ablated group. Scale bars = 10  $\mu\text{m}$ . d) Model depicting structure and function of  
616 the meiotic midbody in mouse oocytes.

617 **Figure S1. Midbody protein localization during Meiosis I and at Metaphase of Meiosis II.** a-c)  
618 Representative confocal images showing the localization of MKLP1 (a), PRC1 (b), and MLKP2 (c) at  
619 Metaphase I, Anaphase I, Telophase I, and Metaphase II; microtubules (gray/green in merge) and DAPI  
620 (blue). Scale bars = 10 $\mu\text{m}$ .

621 **Figure S2. Localization of midbody markers in Telophase of meiosis II.** Representative confocal images  
622 showing the localization of MKLP1, MKLP2, PRC1, and CITK (gray) relative to midzone spindle (green) in  
623 midbody from activated eggs; DAPI in blue. Scale bars = 10  $\mu\text{m}$ .

624 **Figure S3. Latrunculin A treatment for actin depolymerization.** a-b) Representative confocal images  
625 showing the morphology of MKLP1 (gray) relative to midzone spindle (a) and actin (b) (green) in  
626 midbodies from oocytes treated with DMSO, or 5  $\mu\text{M}$  and 10  $\mu\text{M}$  of latrunculin A. c) Quantification of  
627 percentages of normal and abnormal midbodies from oocytes treated with DMSO, or 5  $\mu\text{M}$  and 10  $\mu\text{M}$   
628 latrunculin A.

629 **Figure S4. Abscission of the meiotic midbody is symmetric.** a) Representative confocal images showing  
630 localization of CHMP4B (gray) relative to microtubules (green) and to the MB region in early Telophase I  
631 (top panels), Late Telophase I (middle panels), and Metaphase II (bottom panels). Arrowheads on  
632 CHMP4B and Zoom panels indicate regions of CHMP4B enrichment. b) Representative confocal images  
633 of MKLP1 (gray) and cell boundaries (actin, green) in Metaphase II. On the left, whole egg image with  
634 membrane delineated with dotted, white circle is shown. Orange square indicates the region shown in  
635 the zoom in images on the right side with XY, YZ, and XZ views with a three-dimensional coordinate  
636 system with axes depicting orientation of the different views. Scale bars = 5  $\mu\text{m}$ , 10  $\mu\text{m}$ , and 15  $\mu\text{m}$ .

637 **Figure S5. Detection of meiotic midbody and confirmation of laser ablation.** a) Representative 3D  
638 reconstruction from confocal images showing translation localization (gray) labeled with HPG relative to  
639 MKLP1 cap (magenta). b) Representative confocal images showing microtubules labeled with SiR-  
640 Tubulin and brightfield images of Telophase I-oocytes. The area of ablation is marked with green foci  
641 and the zone after ablation is marked with a white square. The dotted white lines outline the oocyte and  
642 the polar body. Scale bars = 2  $\mu\text{m}$  and 10  $\mu\text{m}$ .



# Figure 1

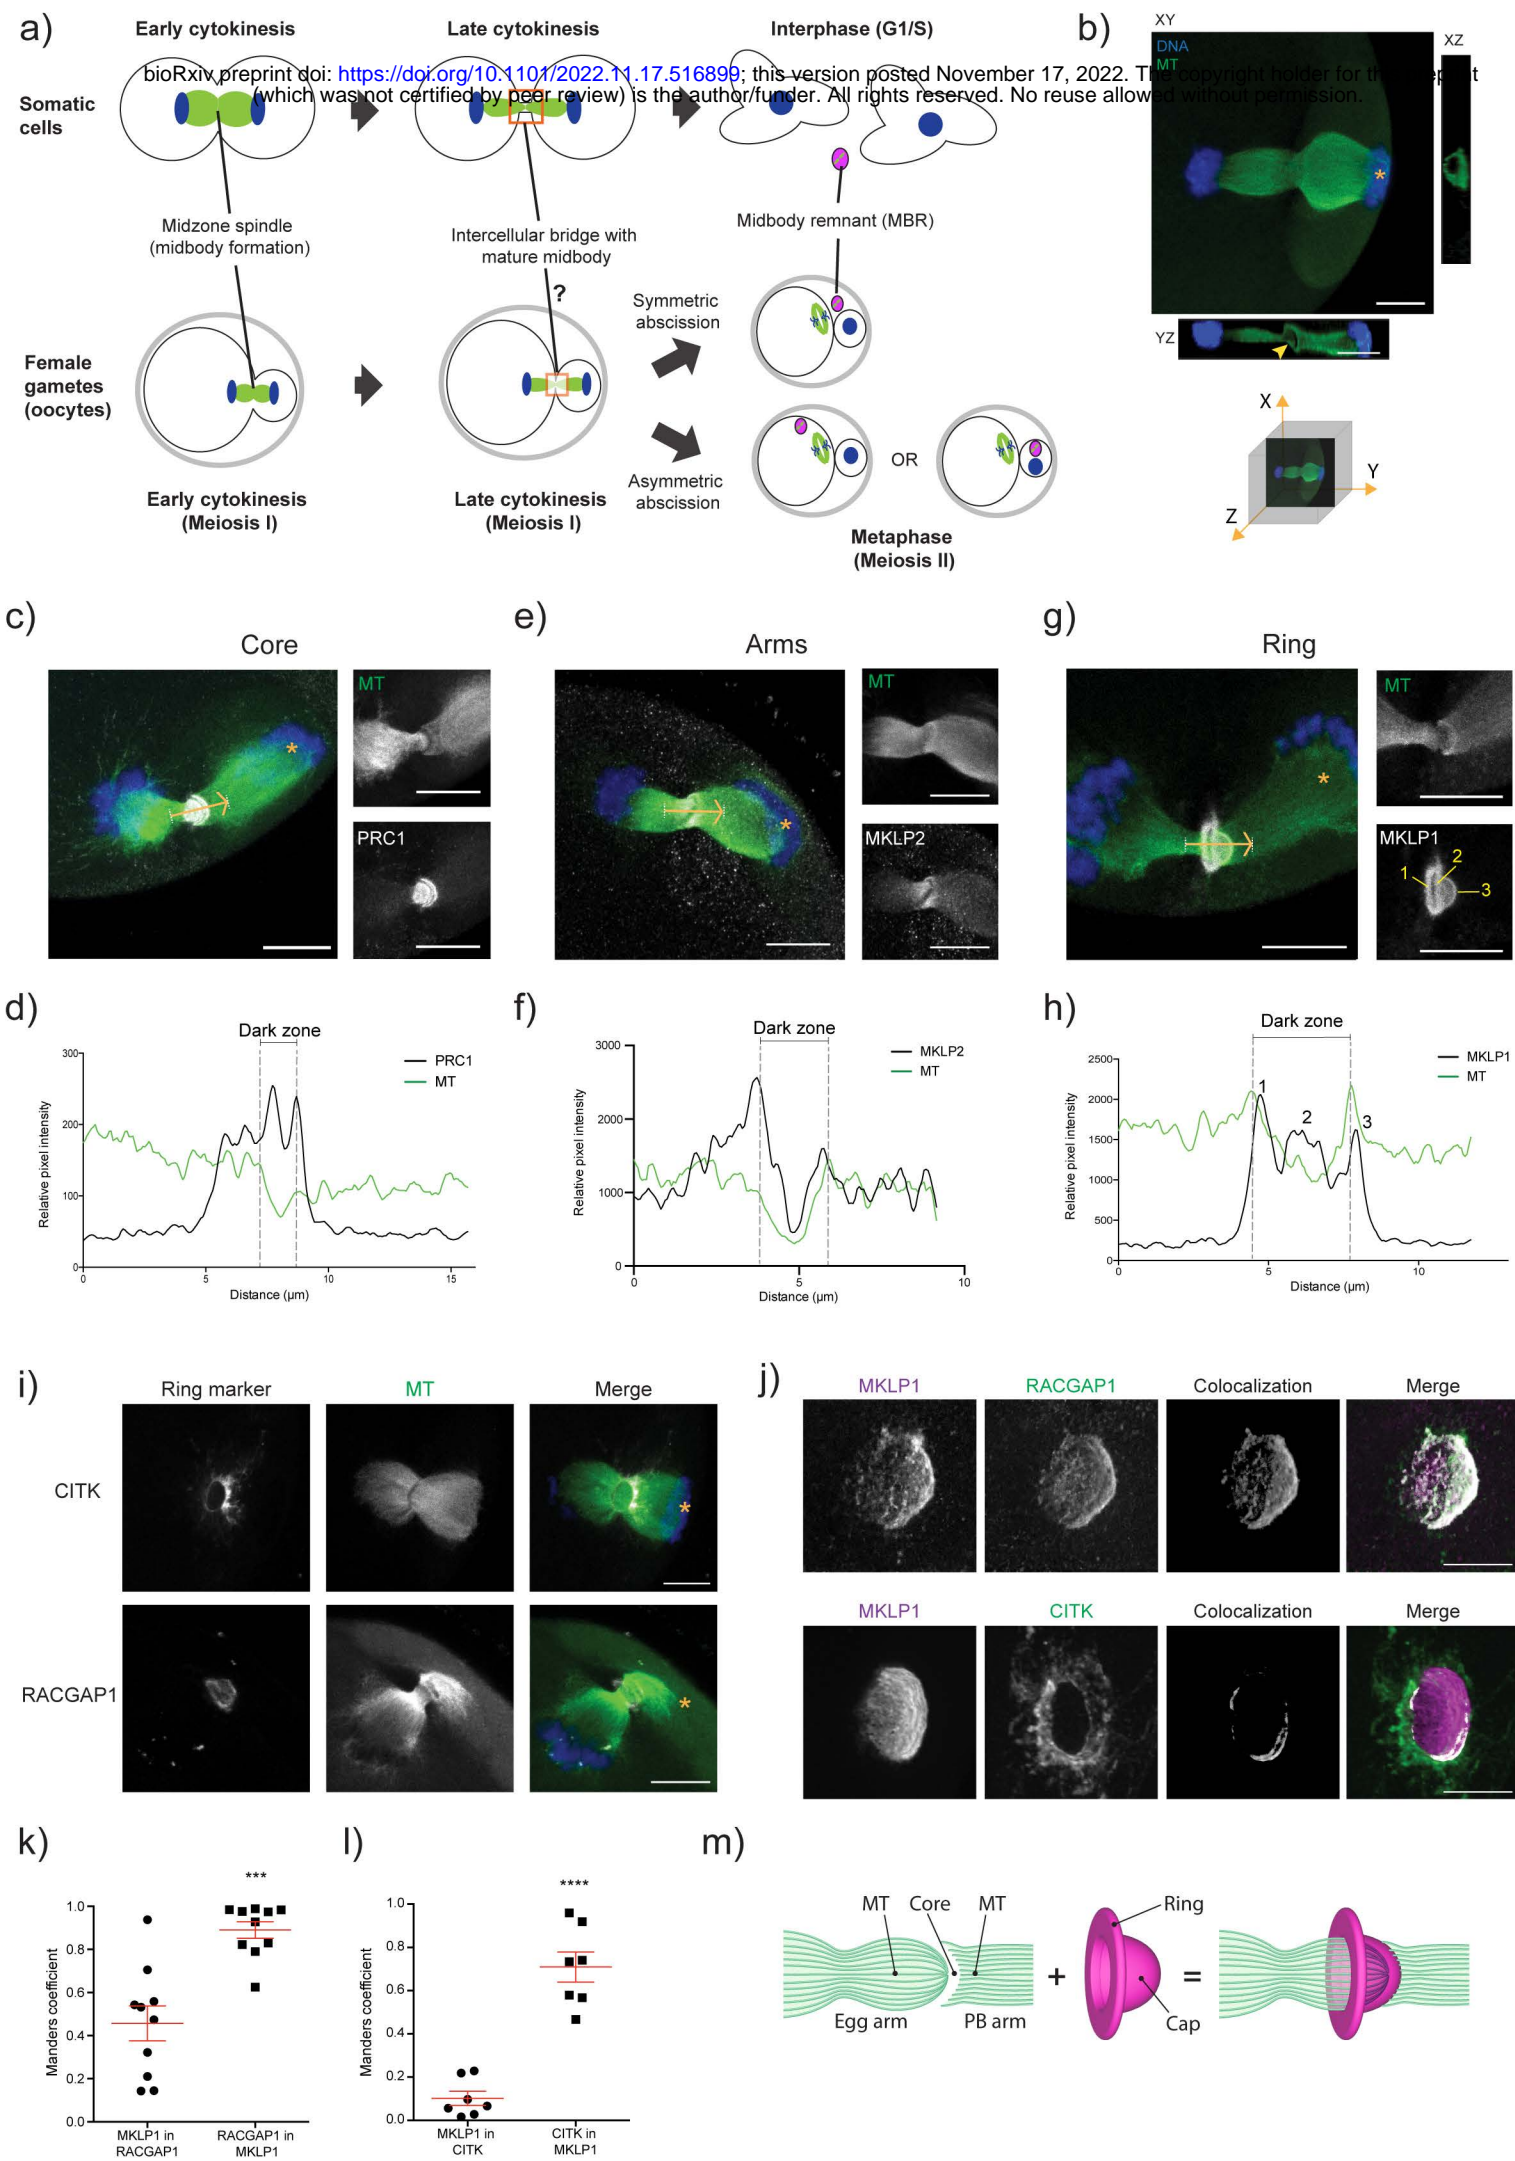

Figure 2

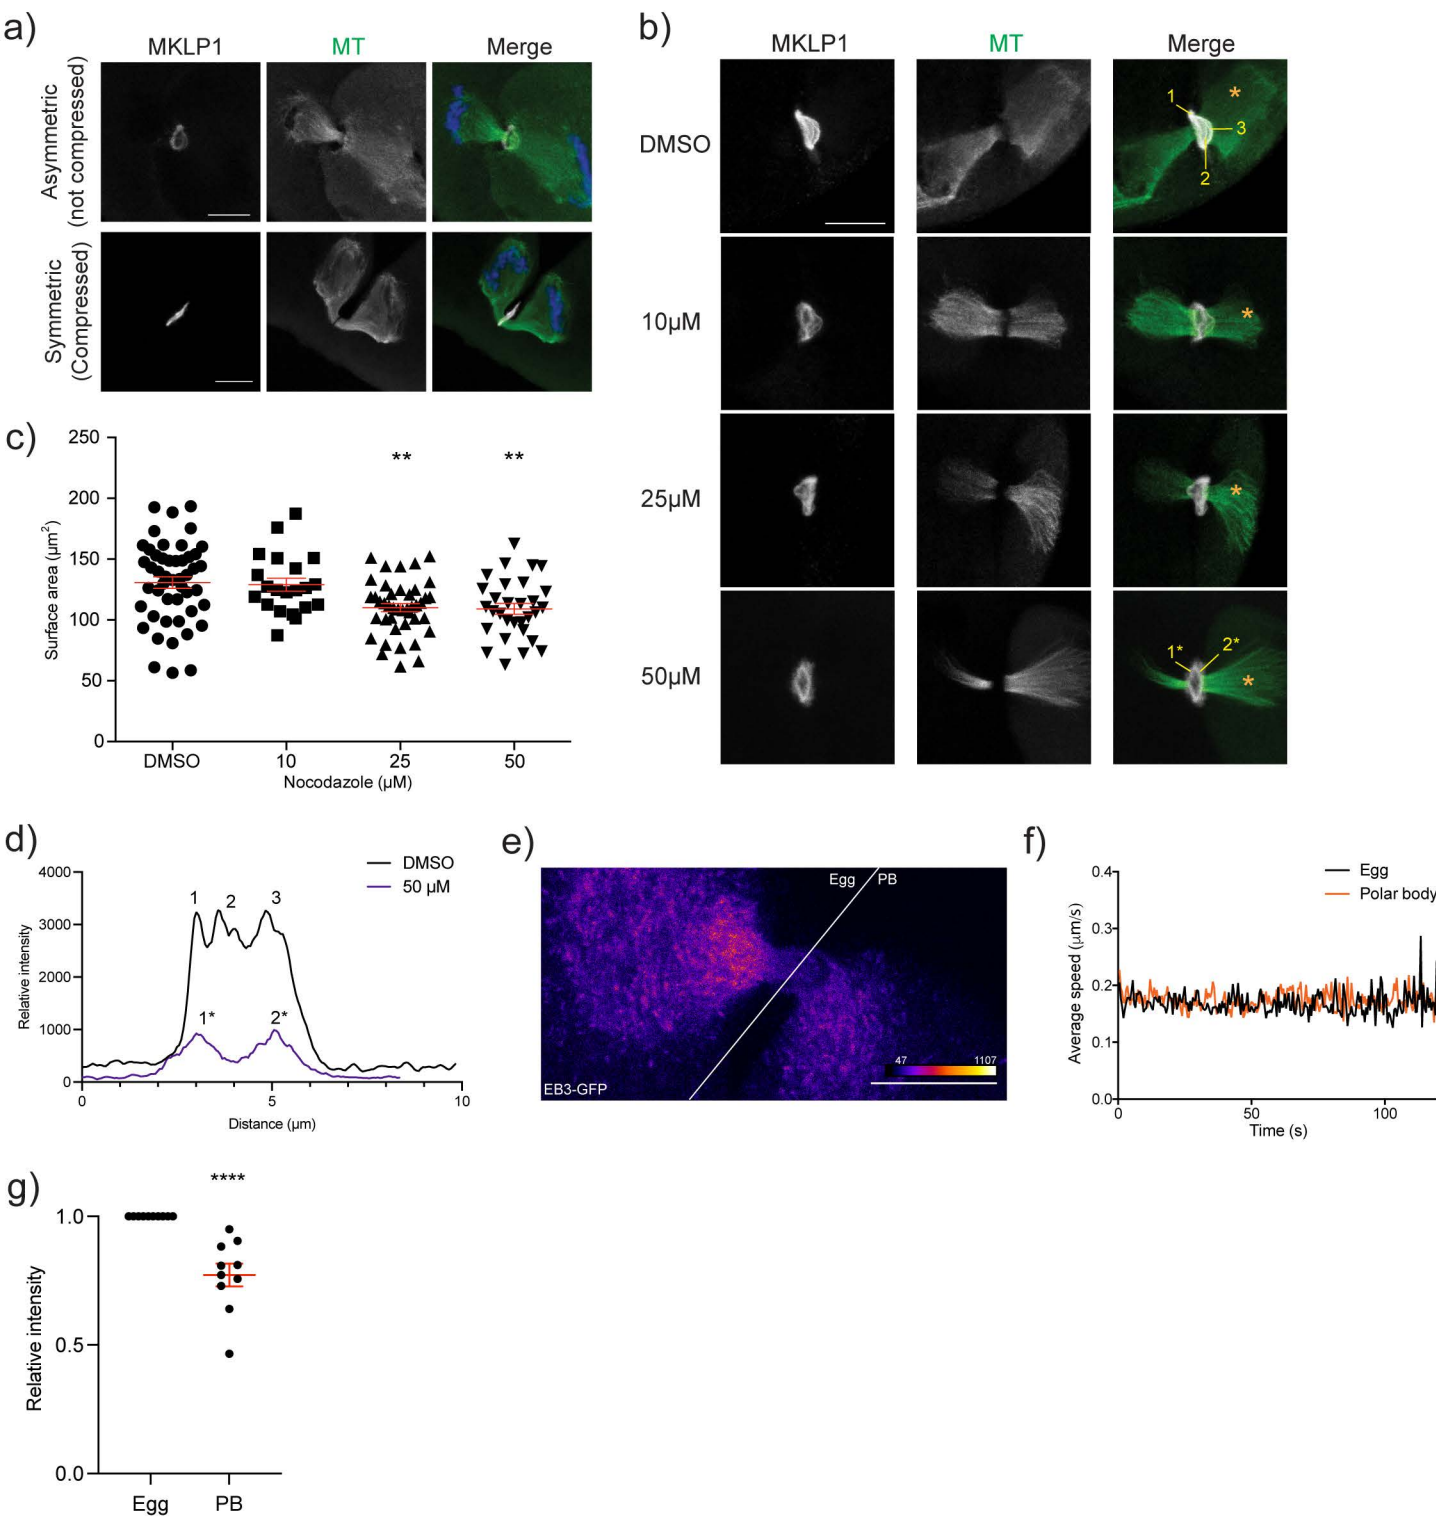

Figure 3

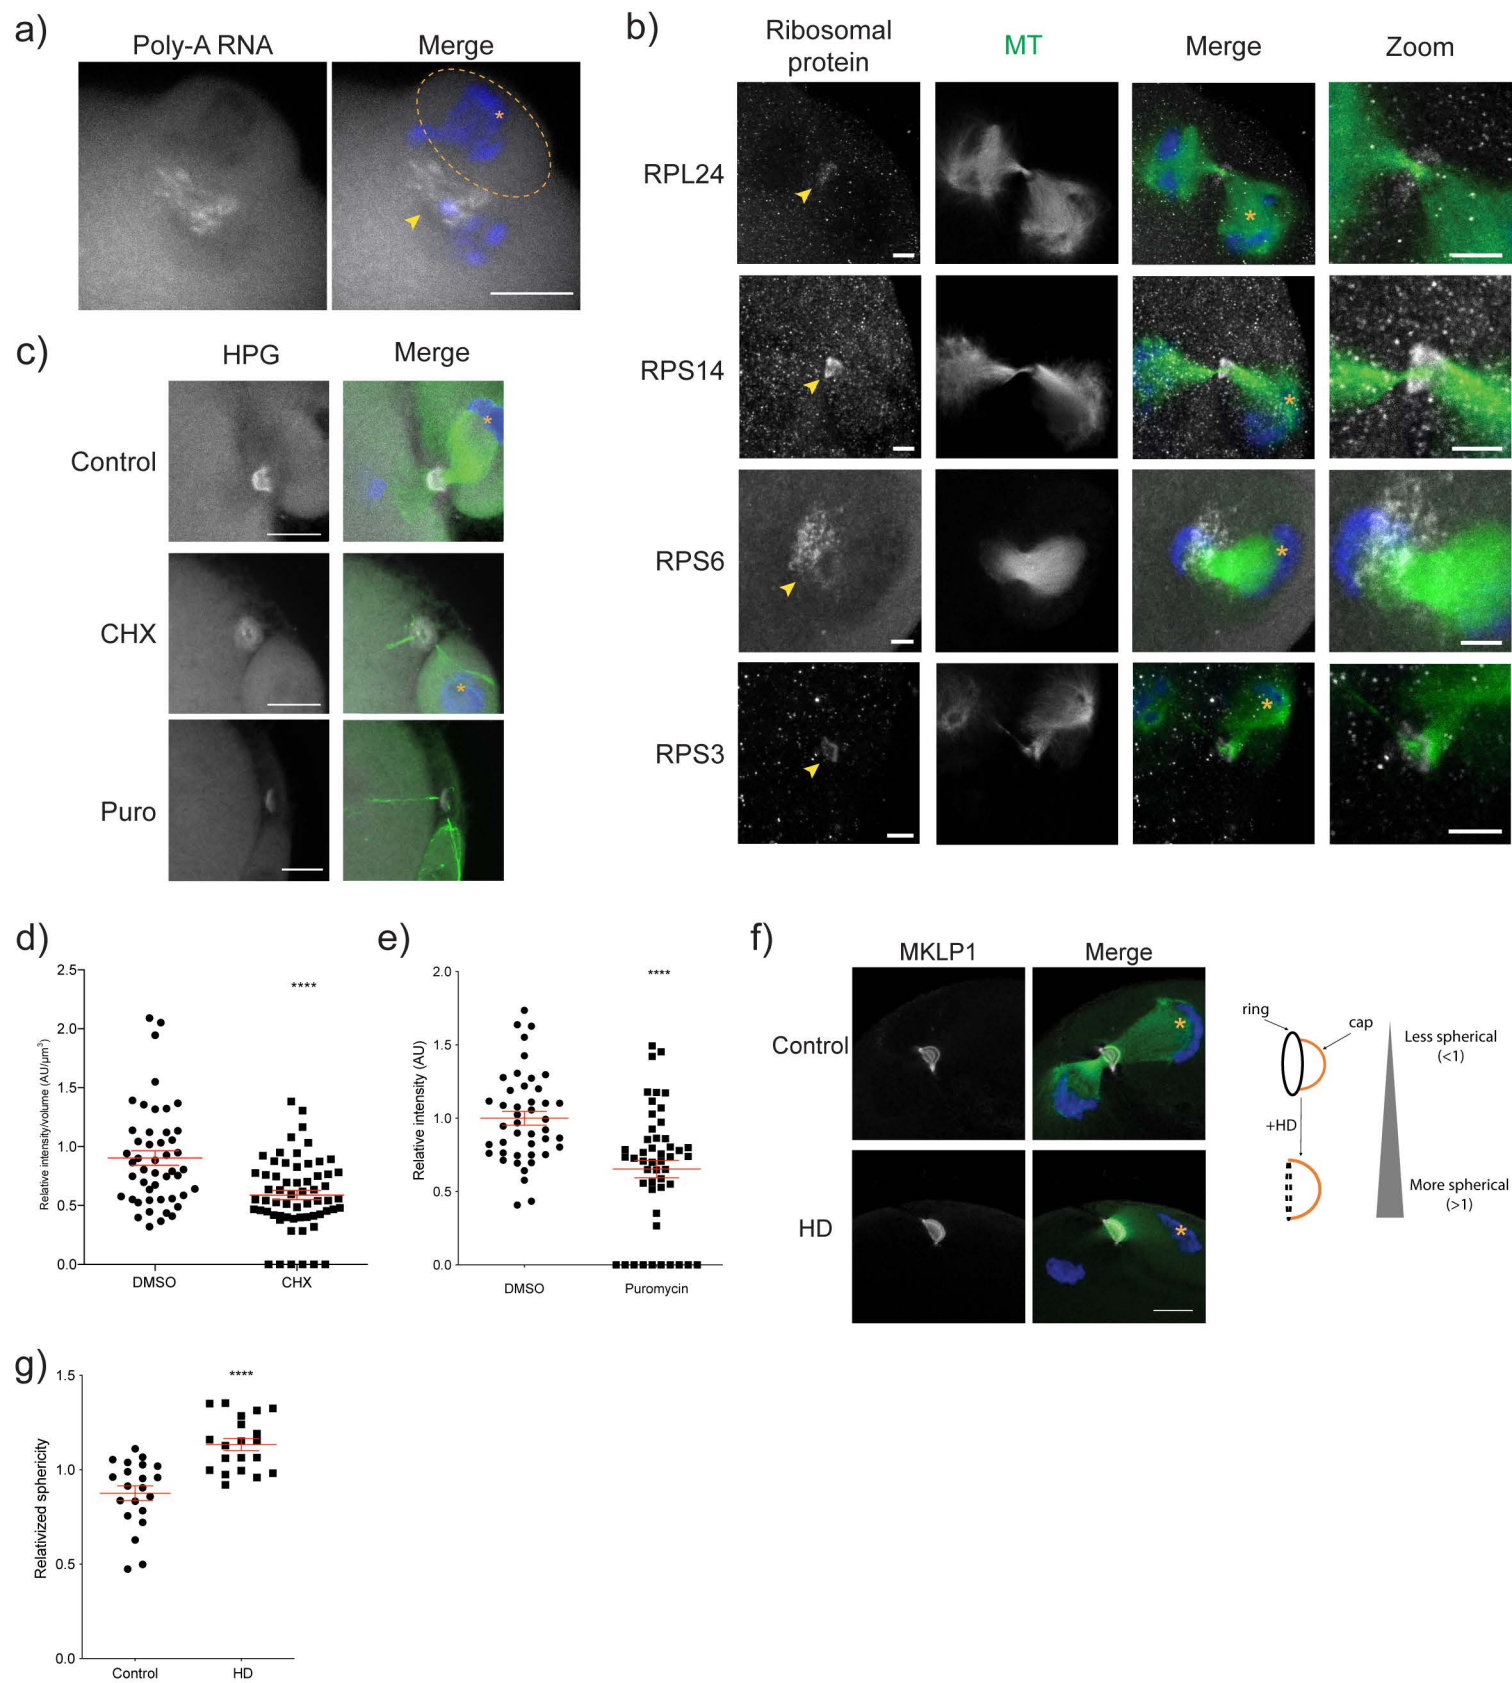

Figure 4

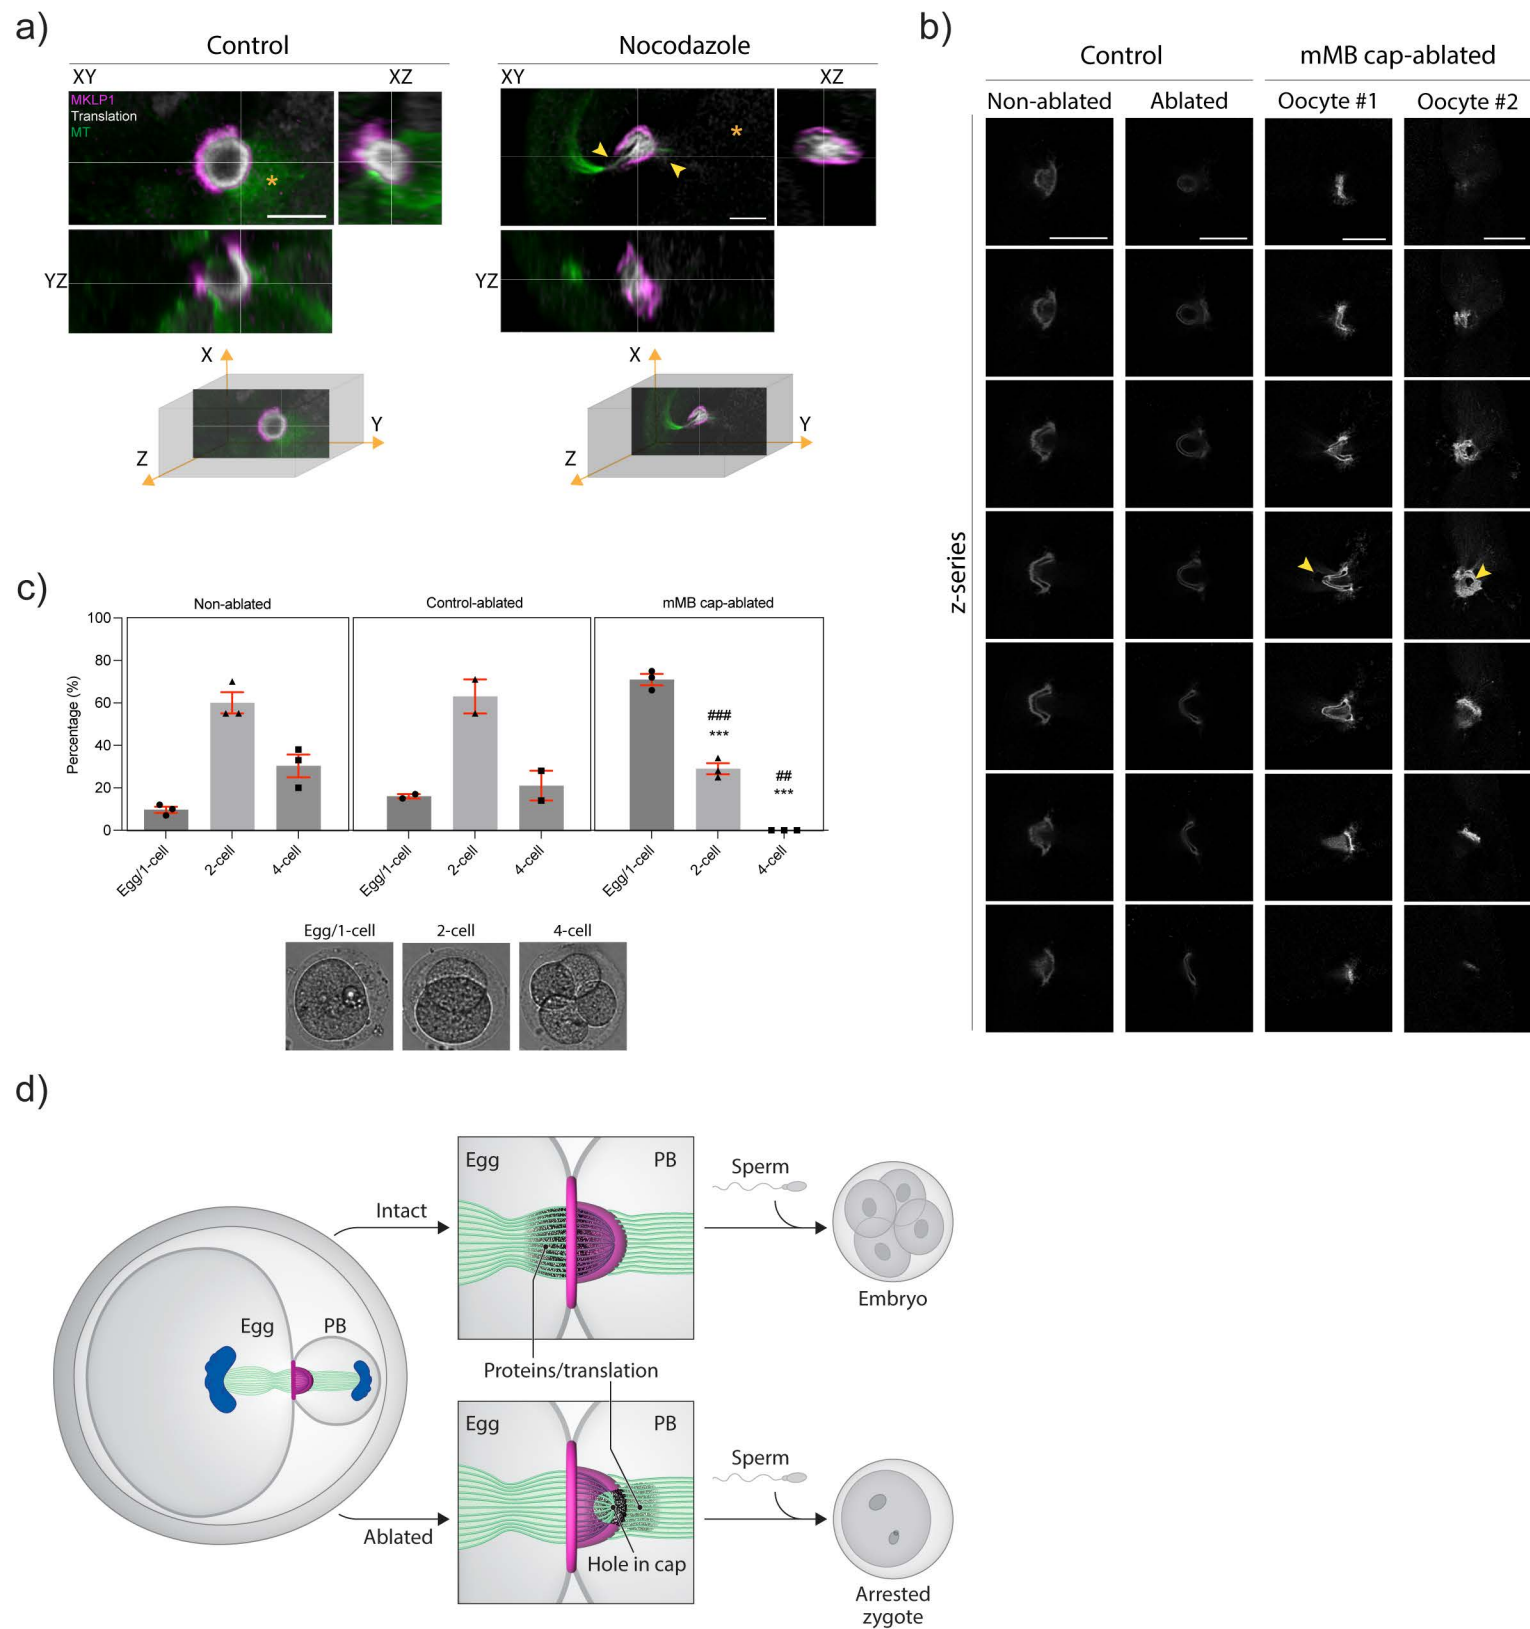

Source: https://www.biorxiv.org/content/10.1101/2022.11.17.516899v1.full.pdf
